# Supplementary material for: High-throughput sequencing of small RNAs and analysis of differentially expressed microRNAs associated with high-fat diet-induced hepatic insulin resistance in mice
Source: PubMed Central journal article supplement (PMC6379981; doi:10.1186/s12263-019-0630-1), 2019-02-19
Supplement: 12263_2019_630_MOESM6_ESM.pdf [file 12263_2019_630_MOESM6_ESM.pdf]

Color Key

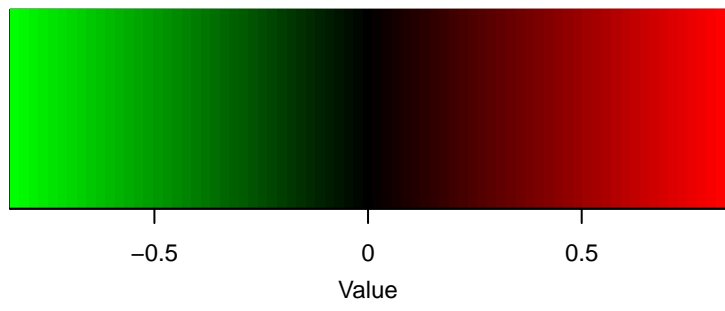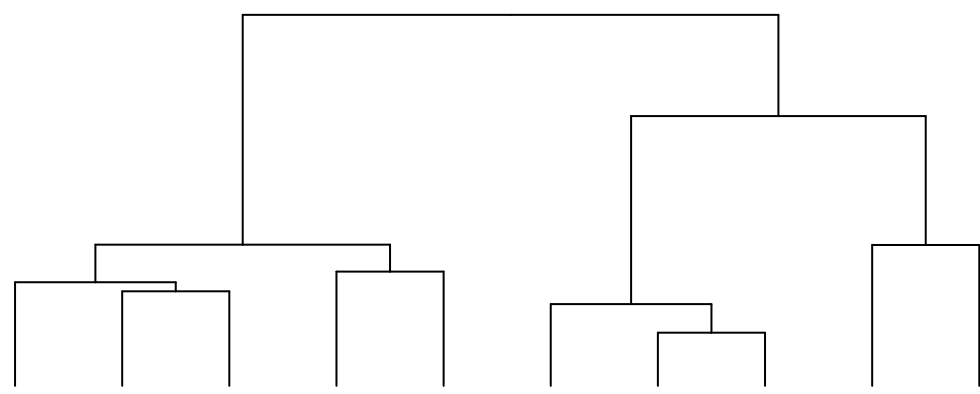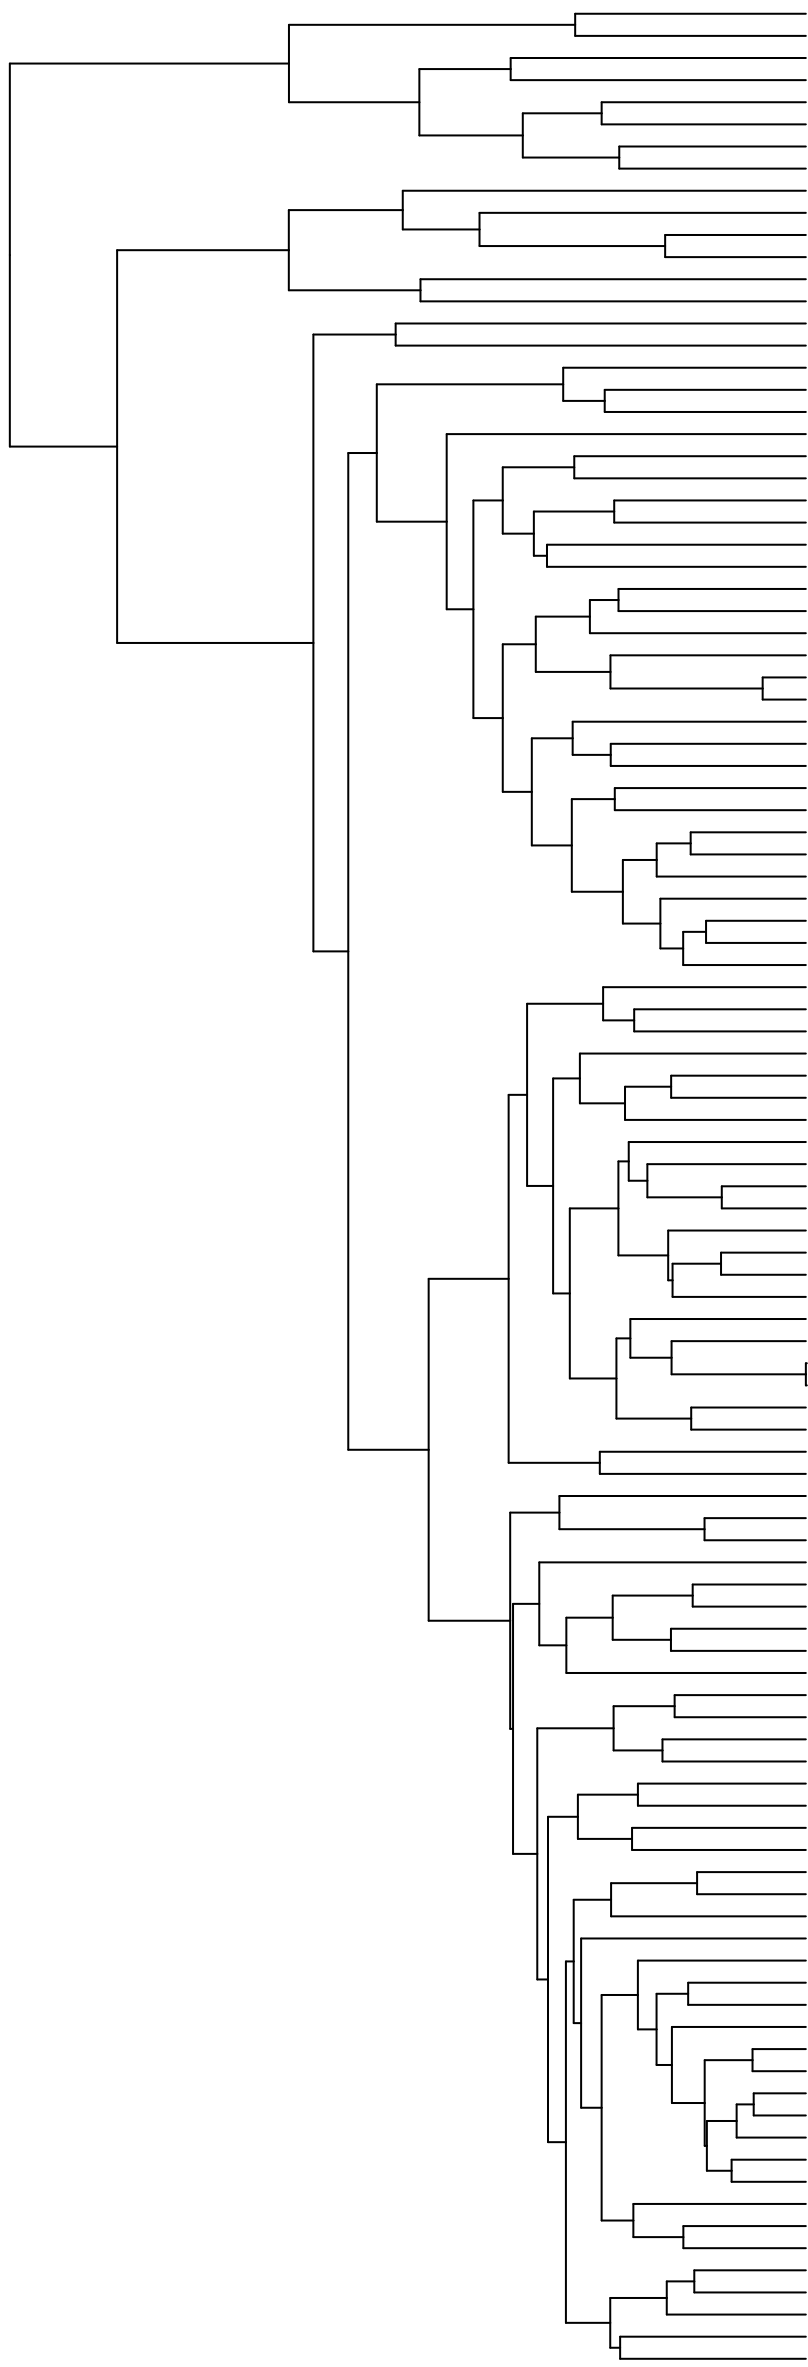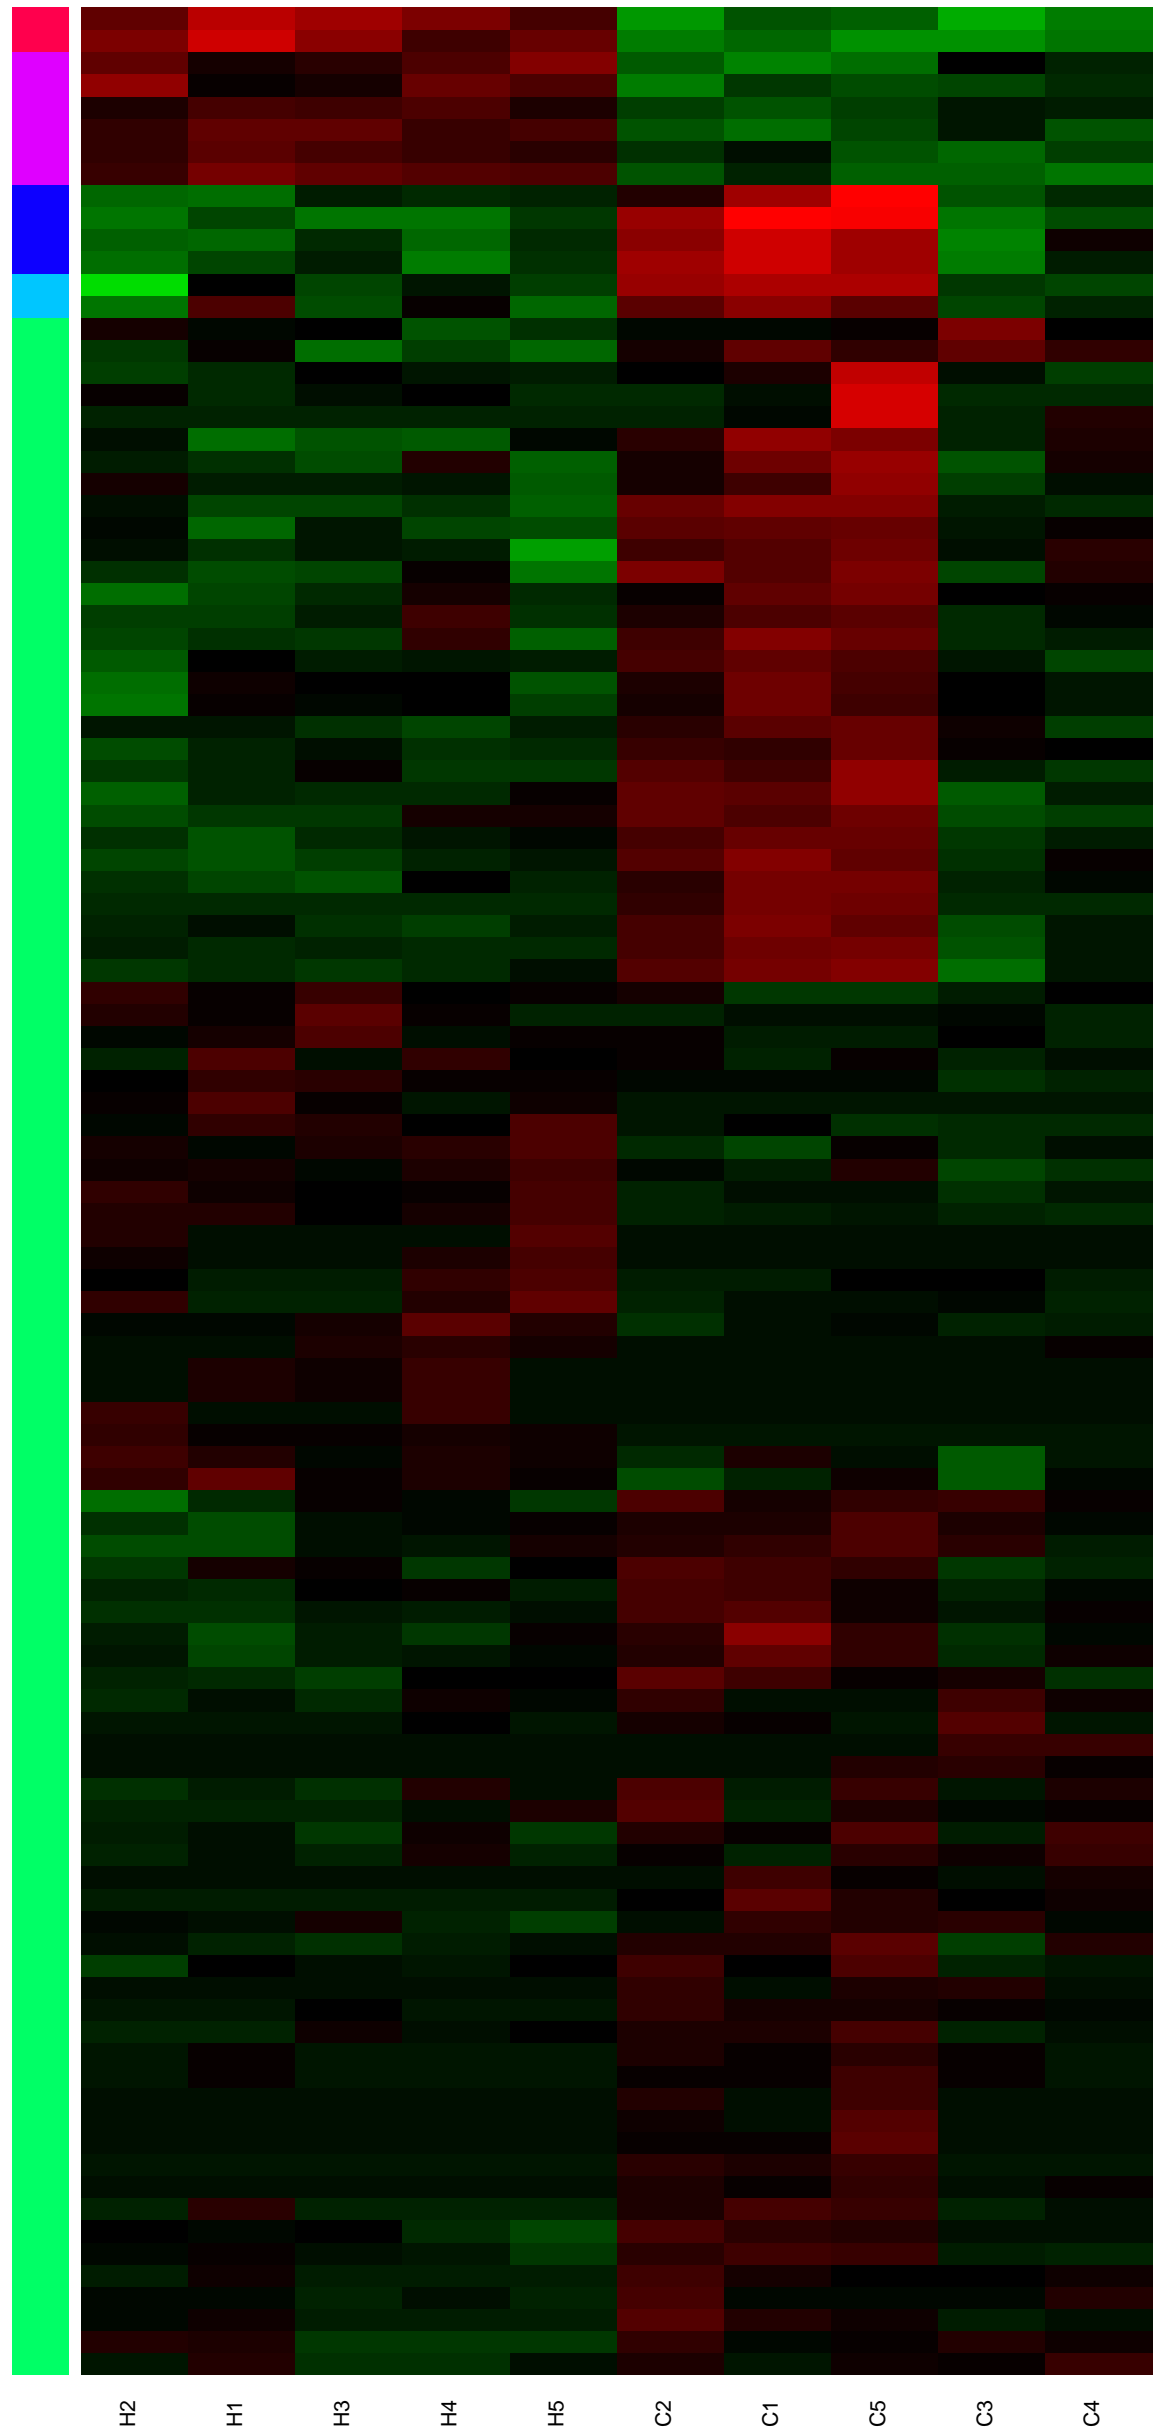

- mmu-miR-582-5p
- mmu-miR-582-3p
- mmu-miR-3065-5p
- mmu-miR-3065-3p
- mmu-miR-335-3p
- mmu-miR-1983
- mmu-miR-34a-5p
- mmu-miR-149-5p
- mmu-miR-375-3p
- mmu-miR-708-5p
- mmu-miR-1a-3p
- mmu-miR-133a-3p
- mmu-miR-10b-5p
- mmu-miR-10b-3p
- mmu-miR-7240-5p
- mmu-miR-592-5p
- mmu-miR-216b-5p
- mmu-miR-217-5p
- mmu-miR-216a-5p
- mmu-miR-136-3p
- mmu-miR-411-3p
- mmu-miR-409-3p
- mmu-miR-9-3p
- mmu-miR-410-3p
- mmu-miR-376b-3p
- mmu-miR-127-5p
- mmu-miR-7b-5p
- mmu-miR-379-3p
- mmu-miR-300-3p
- mmu-miR-329-5p
- mmu-miR-299b-3p
- mmu-miR-299a-3p
- mmu-miR-369-3p
- mmu-miR-494-3p
- mmu-miR-204-5p
- mmu-miR-9-5p
- mmu-miR-376b-5p
- mmu-miR-434-5p
- mmu-miR-381-3p
- mmu-miR-337-5p
- mmu-miR-708-3p
- mmu-miR-434-3p
- mmu-miR-411-5p
- mmu-miR-127-3p
- mmu-miR-6715-5p
- mmu-miR-7043-3p
- mmu-miR-3060-3p
- mmu-miR-3077-3p
- mmu-miR-7236-3p
- mmu-miR-668-3p
- mmu-miR-23a-5p
- mmu-miR-211-5p
- mmu-miR-383-5p
- mmu-miR-6964-3p
- mmu-miR-1947-5p
- mmu-miR-6937-5p
- mmu-miR-8093
- mmu-miR-6942-5p
- mmu-miR-1934-5p
- mmu-miR-7083-5p
- mmu-miR-7032-3p
- mmu-miR-4660-5p
- mmu-miR-466b-5p
- mmu-miR-1958
- mmu-miR-149-3p
- mmu-miR-467c-5p
- mmu-miR-126b-5p
- mmu-miR-92a-1-5p
- mmu-miR-377-3p
- mmu-miR-138-5p
- mmu-miR-665-3p
- mmu-miR-495-3p
- mmu-miR-487b-3p
- mmu-miR-384-3p
- mmu-miR-382-5p
- mmu-miR-376a-5p
- mmu-miR-7224-3p
- mmu-miR-5624-3p
- mmu-miR-883b-3p
- mmu-miR-5126
- mmu-miR-543-3p
- mmu-miR-540-3p
- mmu-miR-490-3p
- mmu-miR-485-5p
- mmu-miR-8097
- mmu-miR-7116-5p
- mmu-miR-370-3p
- mmu-miR-154-3p
- mmu-miR-329-3p
- mmu-miR-6988-3p
- mmu-miR-133b-3p
- mmu-miR-433-3p
- mmu-miR-7649-3p
- mmu-miR-3969
- mmu-miR-590-3p
- mmu-miR-224-3p
- mmu-miR-135b-5p
- mmu-miR-153-3p
- mmu-miR-1247-3p
- mmu-miR-384-5p
- mmu-miR-382-3p
- mmu-miR-124-3p
- mmu-miR-694
- mmu-miR-183-3p
- mmu-miR-154-5p
- mmu-miR-103-2-5p
- mmu-miR-100-3p

Additional file 6 The heatmap of differentially expressed known miRNAs in ND and HFD groups.
