# Supplementary material for: High-throughput sequencing of small RNAs and analysis of differentially expressed microRNAs associated with high-fat diet-induced hepatic insulin resistance in mice
Source: PubMed Central journal article supplement (PMC6379981; doi:10.1186/s12263-019-0630-1), 2019-02-19
Supplement: 12263_2019_630_MOESM7_ESM.pdf [file 12263_2019_630_MOESM7_ESM.pdf]

Color Key

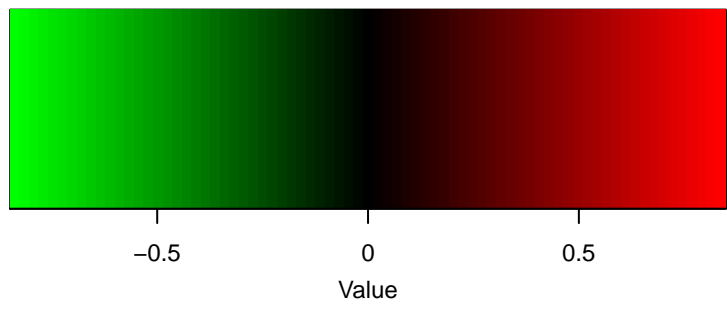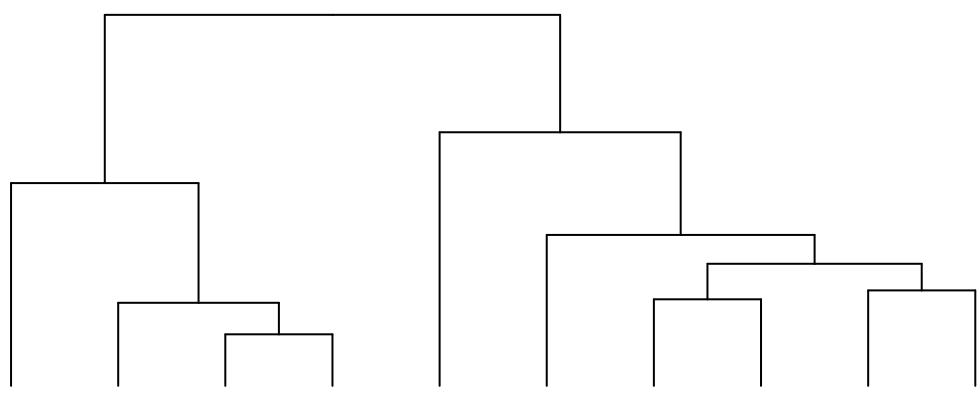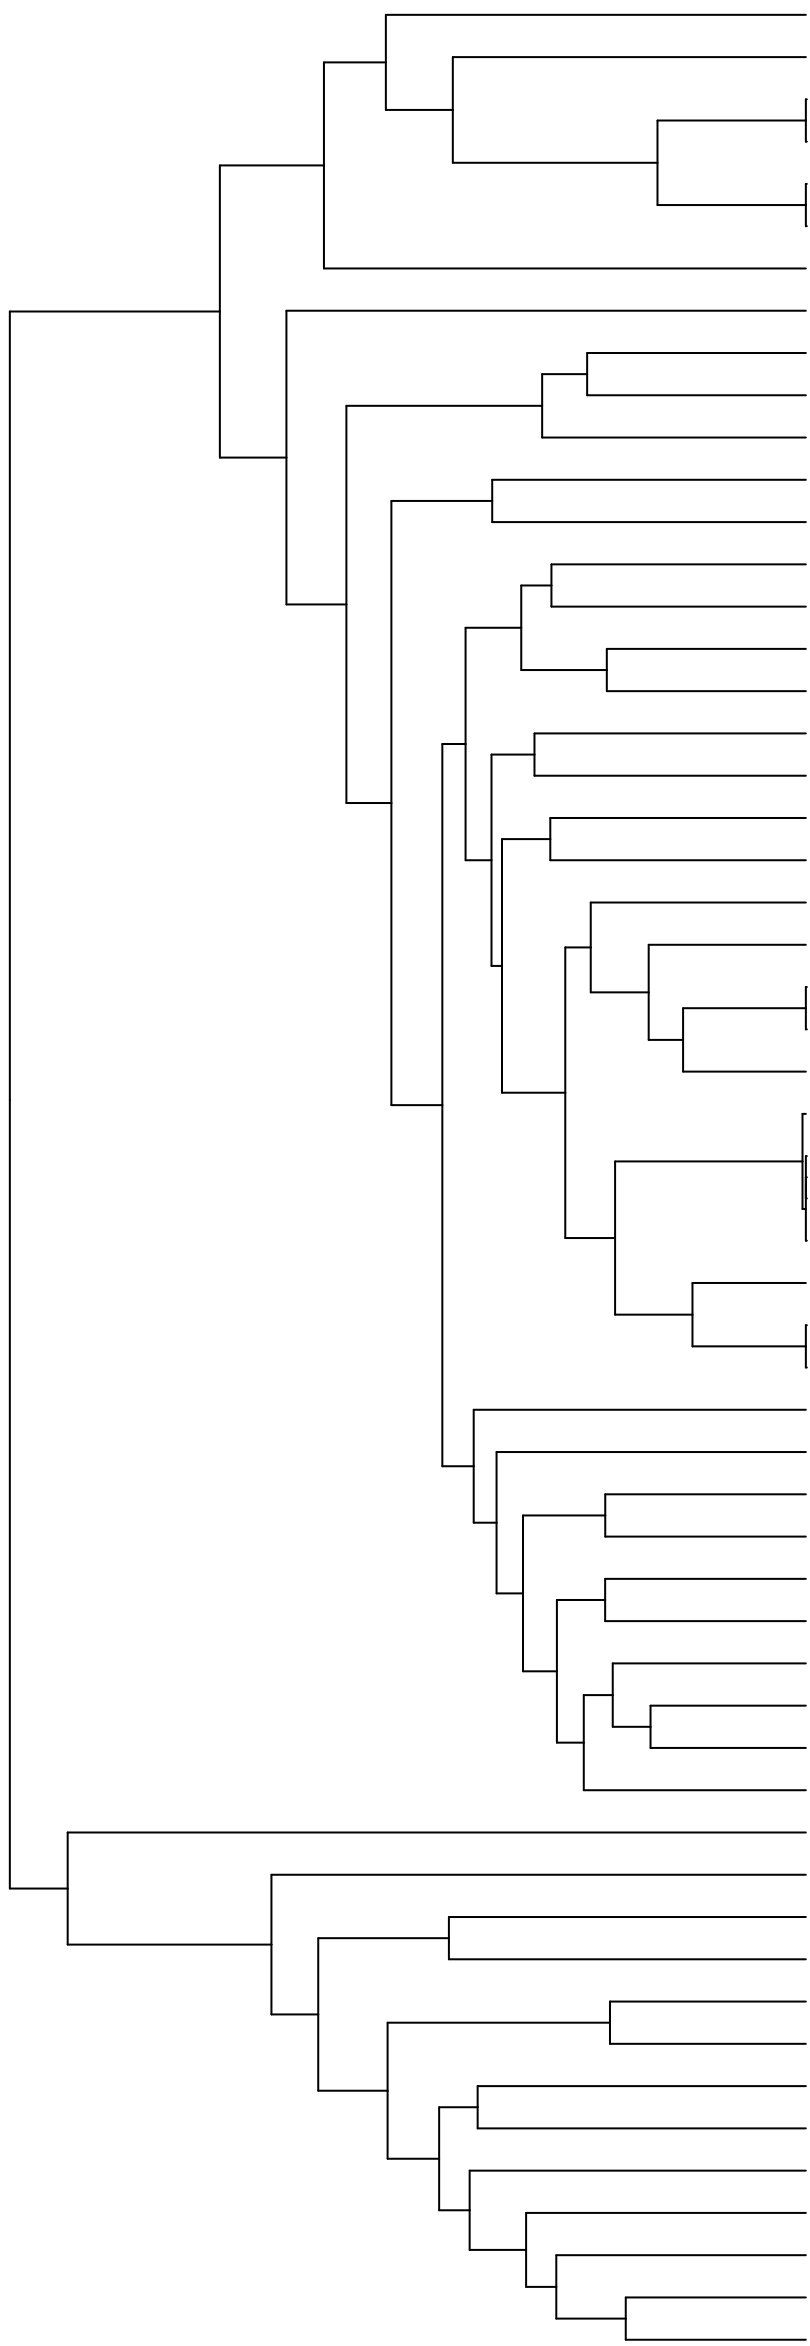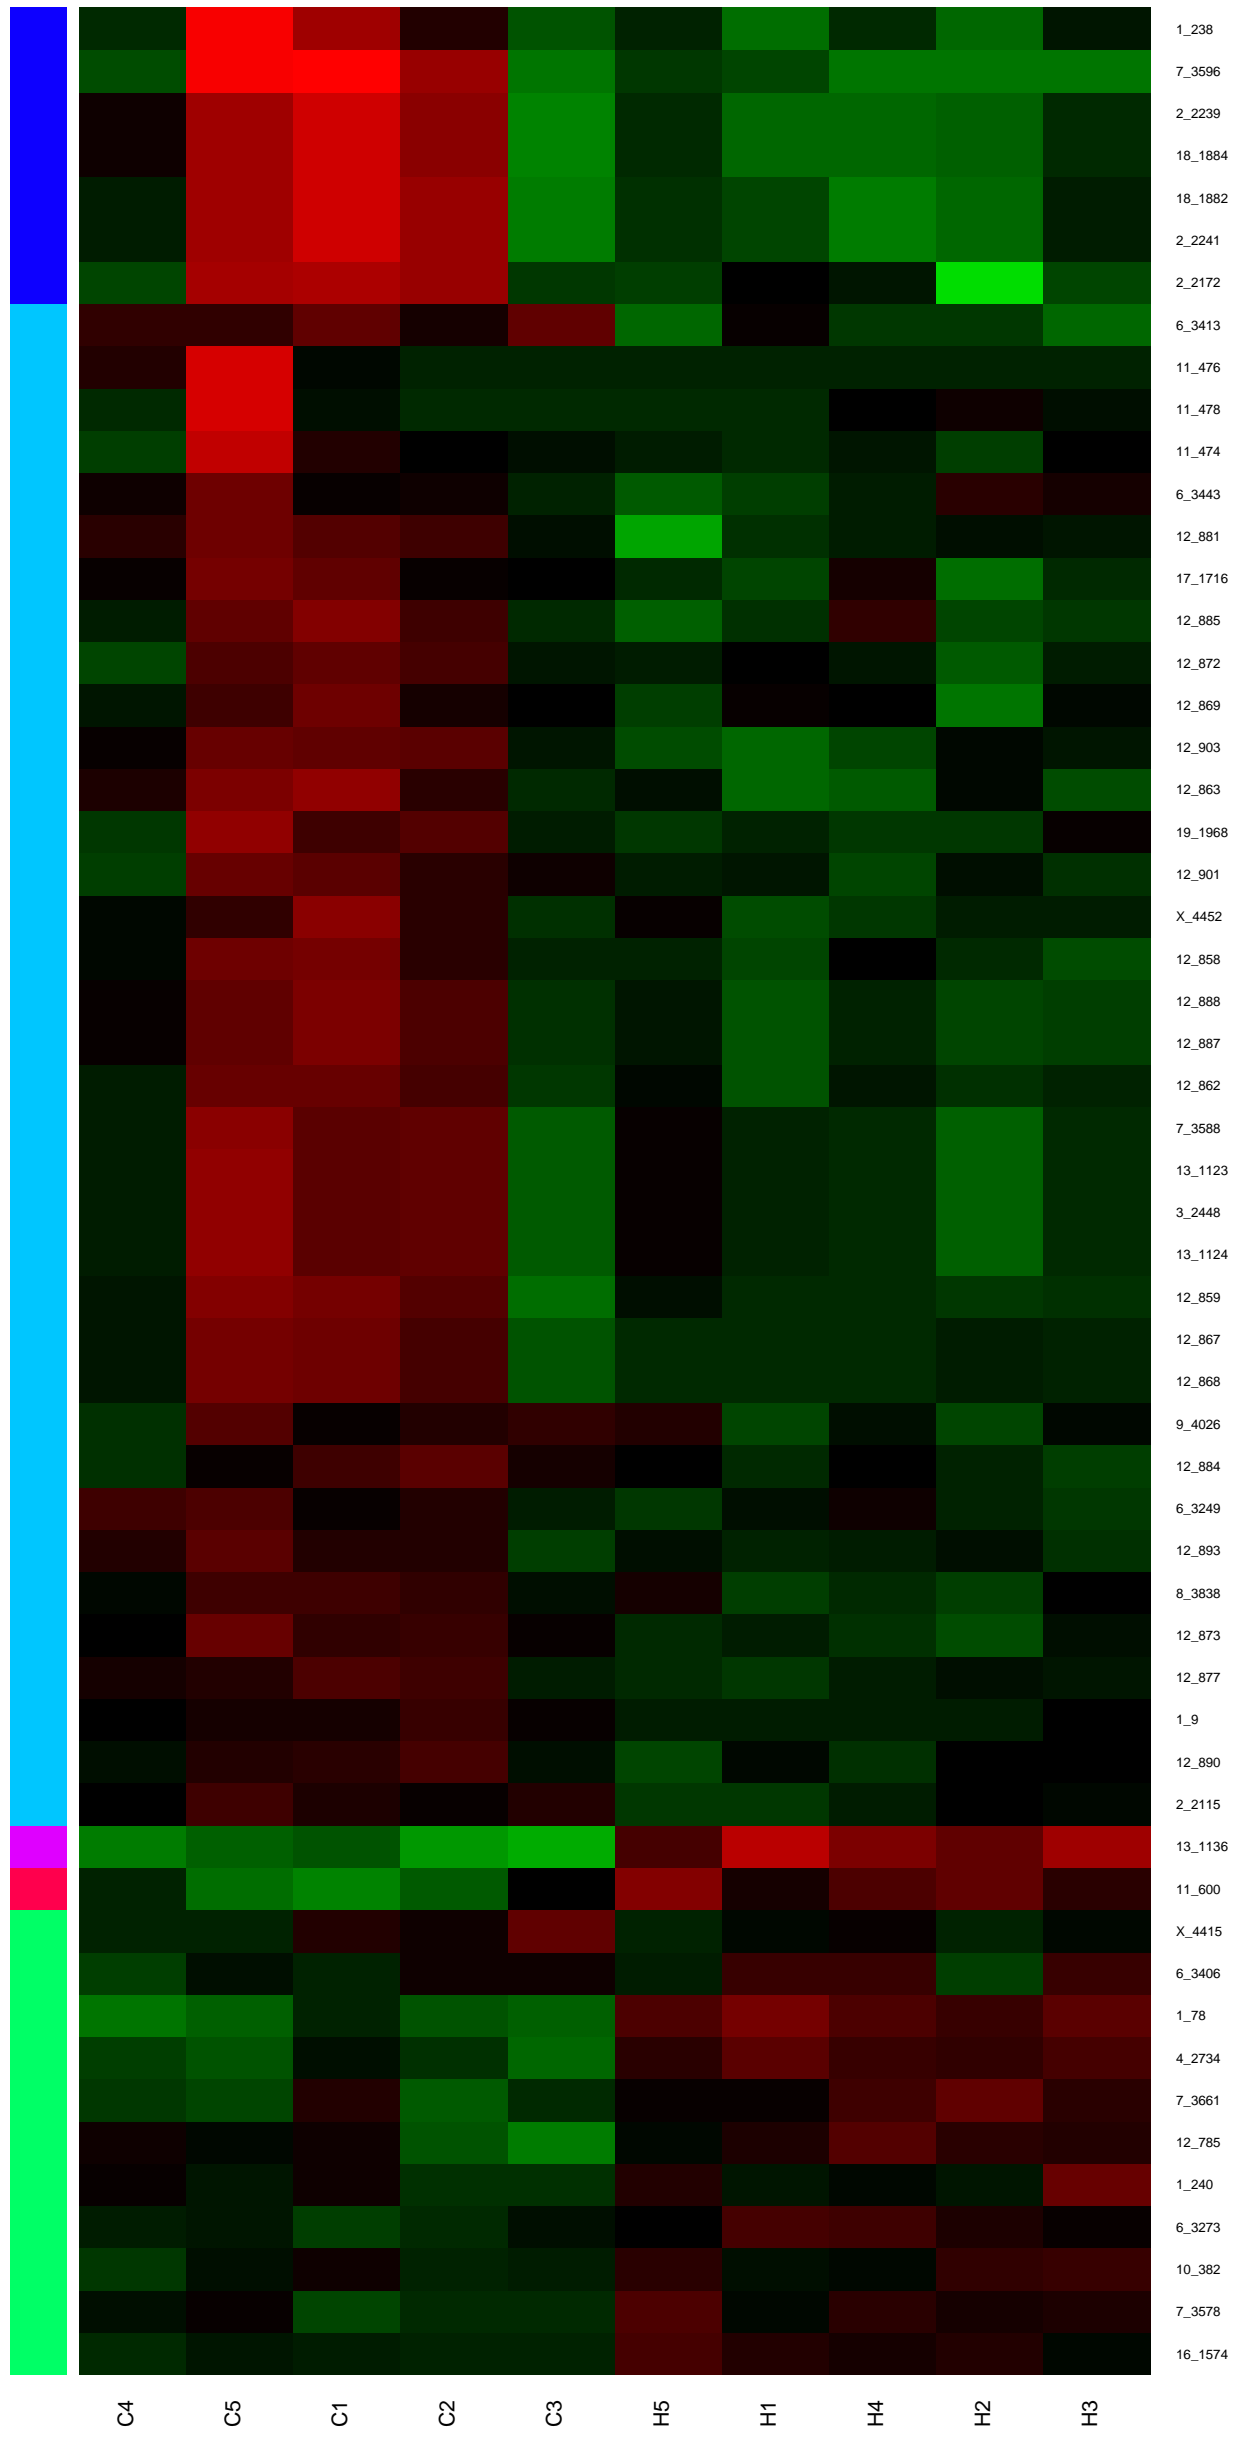

Additional file 7 The heatmap of differentially expressed novel miRNAs in ND and HFD groups.
